# Supplementary material for: Maternal Autogenous Inactivated Virus Vaccination Boosts the Piglet Humoral and Cell-Mediated Immunity to PRRSV via Transfer of Neutralizing Antibodies and Interferon-Gamma Producing B Cells
Source: Preprints.org preprint supplement (doi:10.20944/preprints202012.0074.v1), 2020-12-03
Supplement: Supplementary file 1 [file supplementary]

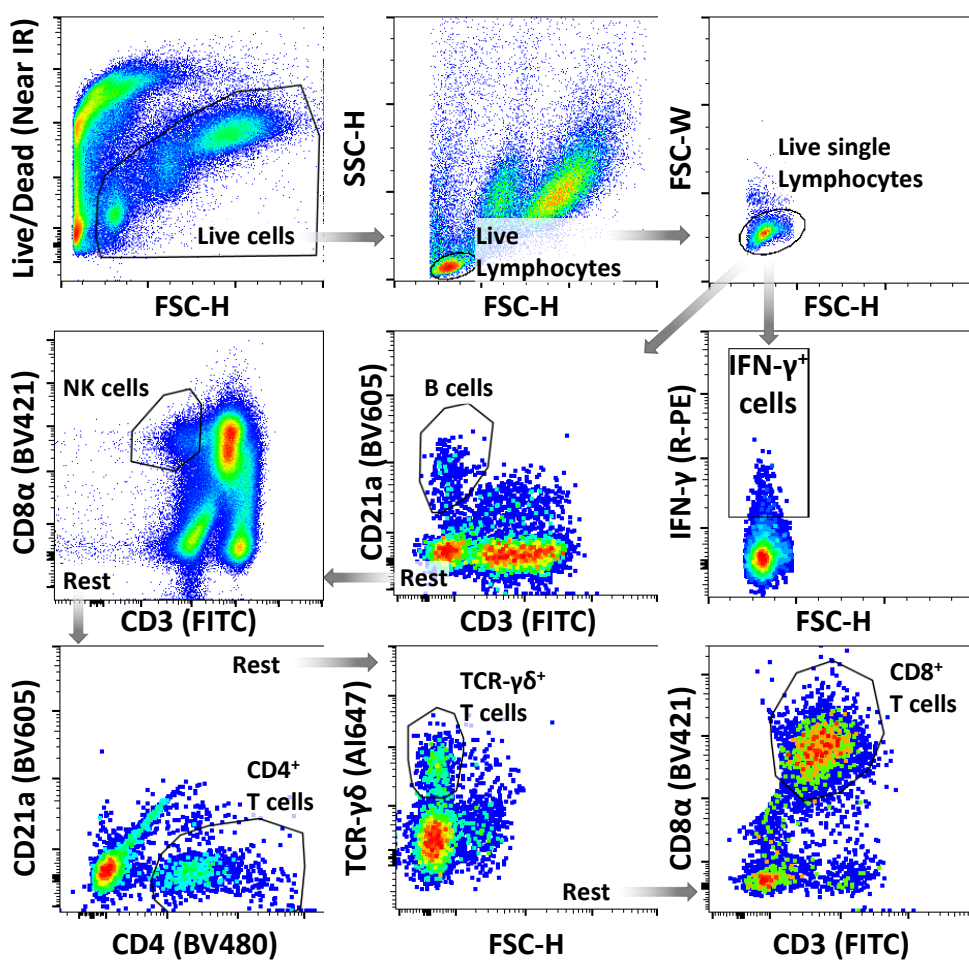

**Supplementary Figure 1: Gating hierarchy for IFN- $\gamma$  response to PRRSV in BAL (shown), lung tissue and tracheobronchial lymph nodes:** Due to a higher autofluorescence of some cells isolated from BAL, lung and lymph node tissue, the gating hierarchy had to be adapted. Dead cells were excluded by a Live/Dead discrimination dye. Next, live lymphocytes were gated based on their size (FSC-H) and granularity (SSC-H). FSC-H was FSC-W was used to exclude doublets to ensure the further analysis is performed on single living lymphocytes (SLLs). The IFN- $\gamma$  expression of these SLLs was analyzed via FSC-H vs IFN- $\gamma$ -R-PE. As well, SLL immune cell subsets were further discriminated into B cells (CD3-CD21a<sup>+</sup>); the non-B cells were used to gate for NK cells (CD3-CD8 $\alpha$ <sup>+</sup>); the remaining non-B-non-NK cells were used to gate on CD4 T cells (CD4<sup>+</sup>CD21a<sup>-</sup>), then on TCR- $\gamma\delta$  T cells (FSC-H<sup>low</sup>TCR- $\gamma\delta$ <sup>+</sup>) and CD8 T cells (CD3<sup>+</sup>CD4<sup>-</sup>TCR- $\gamma\delta$ -CD8 $\alpha$ <sup>+</sup>). These immune cell subgates were then applied to IFN- $\gamma$ <sup>+</sup> cells to determine the contribution of each subset to the overall IFN- $\gamma$  production in SLLs.
