# Supplementary material for: Maternal Autogenous Inactivated Virus Vaccination Boosts the Piglet Humoral and Cell-Mediated Immunity to PRRSV via Transfer of Neutralizing Antibodies and Interferon-Gamma Producing B Cells
Source: Preprints.org preprint supplement (doi:10.20944/preprints202012.0074.v1), 2020-12-03
Supplement: Supplementary file 2 [file supplementary]

Archive with 2 entries (2 files):
- SF1901_Supplementary Figure 1_Gating hierarchy for tissue IFN-g response_final.pdf
- SF1901_Supplementary Figure 2_Systemic IFNg production in immune cell subsets_final.pdf
