# Supplementary material for: Maternal Autogenous Inactivated Virus Vaccination Boosts the Piglet Humoral and Cell-Mediated Immunity to PRRSV via Transfer of Neutralizing Antibodies and Interferon-Gamma Producing B Cells
Source: Preprints.org preprint supplement (doi:10.20944/preprints202012.0074.v1), 2020-12-03
Supplement: Supplementary file 2 [file supplementary › SF1901_Supplementary Figure 2_Systemic IFNg production in immune cell subsets_final.pdf]

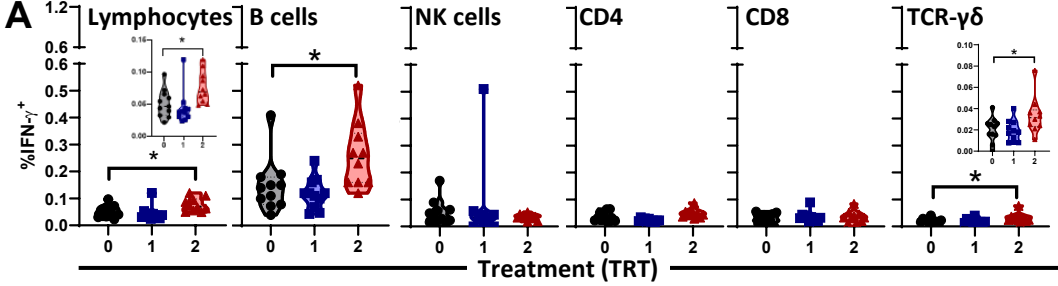

**Supplementary Figure 2: Systemic IFN- $\gamma$  response to PRRSV 1-7-4 in pre-challenge piglets at 2 weeks of age (0 wpi).** The IFN- $\gamma$  production of blood immune cell subsets is shown as a percentage of all SLLs, B cells, NK cells, CD4, CD8, and TCR- $\gamma\delta$  T cells (from left to right). Data were analyzed via 1-way ANOVA with Dunnett's multiple comparisons. Significant differences between treatments are designated as \*  $p < 0.05$ .
